# Supplementary material for: Near-Infrared Fluorescence Imaging of Carotid Plaques in an Atherosclerotic Murine Model
Source: MDPI journal article supplement (doi:10.3390/biom11121753), 2021-11-24
Supplement: s1 [file s1]

Supplementary Materials for Biomolecules-Special Issue submission  
 "Near-infrared fluorescence imaging of carotid plaques in a atherosclerotic murine model" X.Wu et al.

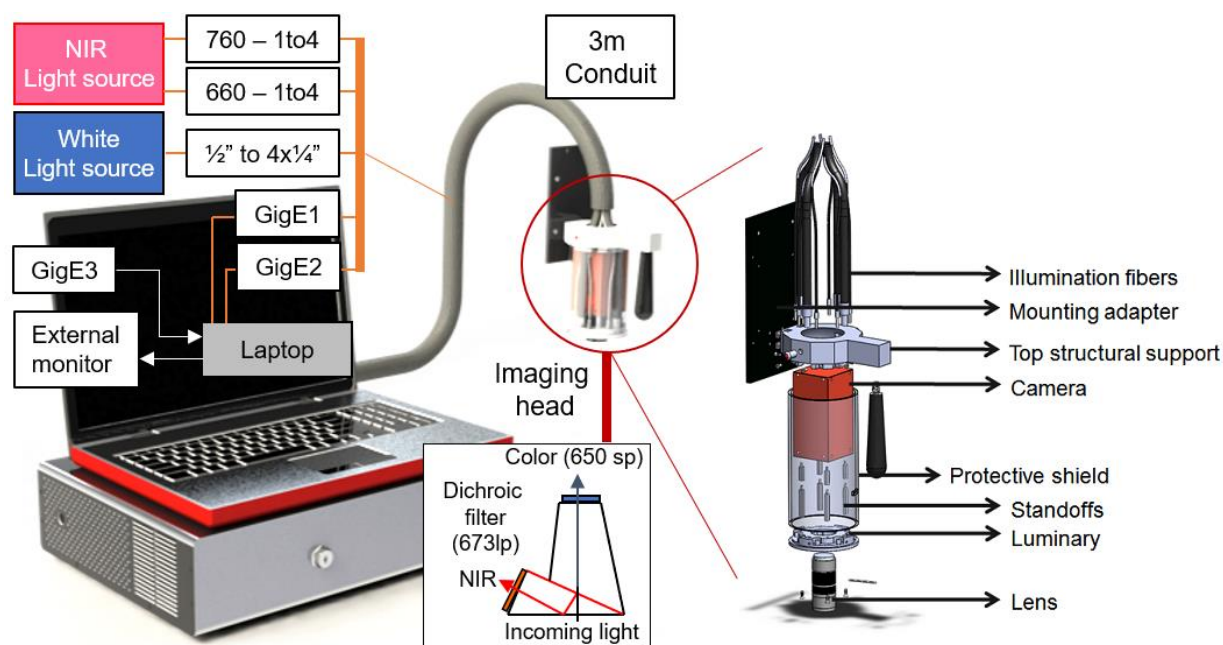

Figure S1: NIRF imaging system<sup>9</sup> used that has white light and NIR sources (660 and 760 nm). The 760 nm excitation source was used for this study.
